# Supplementary material for: Boosted formic acid electro-oxidation on platinum nanoparticles and “mixed-valence” iron and nickel oxides
Source: PubMed Central journal article supplement — RSC Adv. 2023 Jul 11;13(30):20799–809. doi: 10.1039/d3ra03350c (PMC10333810; doi:10.1039/d3ra03350c), 2023-07-11
Supplement: RA-013-D3RA03350C-s001.pdf [file RA-013-D3RA03350C-s001.pdf]

## Supplementary information

### ECSA calculations

The ECSA ( $\text{cm}^2$ ) was calculated from Fig. 2 by employing the monolayer adsorption charge of hydrogen onto Pt,  $210 \mu\text{C}/\text{cm}^2$  with the aid of this equation <sup>32, 34, 42</sup>:

$$ECSA = \frac{Q \text{ of } H_{des}(\mu\text{C}) \text{ from Fig. 2}}{210 \mu\text{C}/\text{cm}^2}$$

The charge of Hdes was estimated directly from the potentiostat for the Hdes peak on Pt as indicated in the following figure:

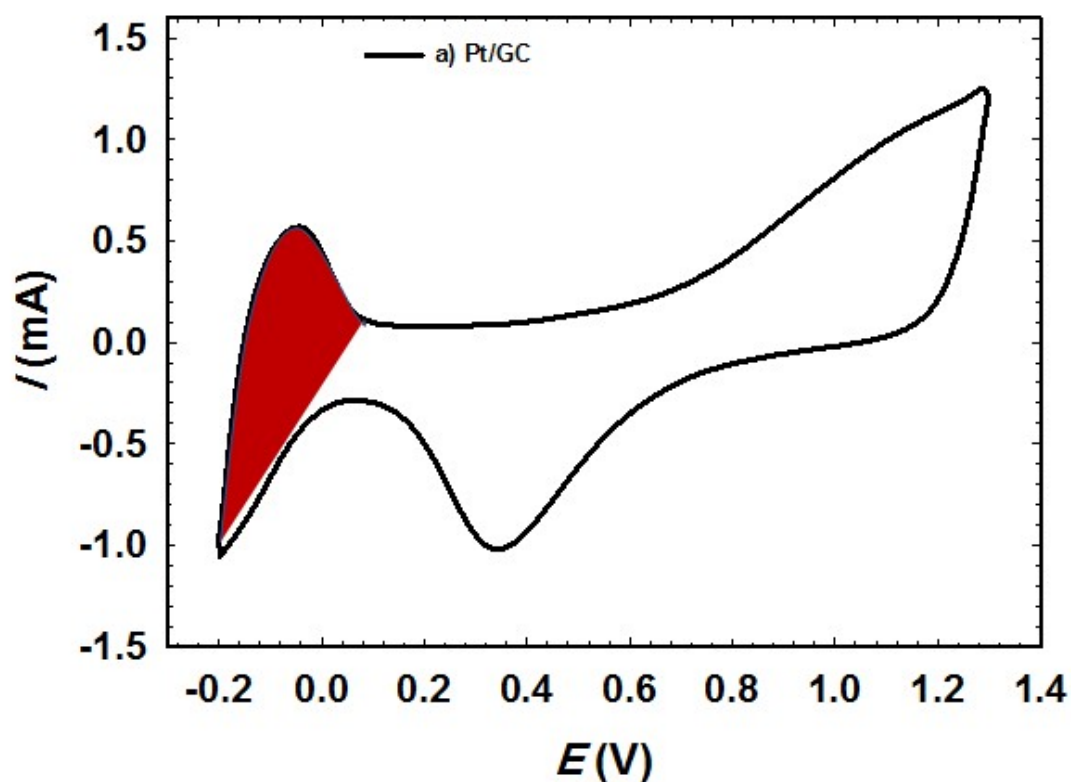

**Fig. S1:** CVs obtained for the Pt/GC in  $0.5 \text{ mol L}^{-1} \text{ H}_2\text{SO}_4$  at a scan rate of  $200 \text{ mV/s}$ . The highlighted area is used to assess the charge ( $Q$ ) involved in the  $\text{H}_{des}$  peak.

$$ECSA \text{ of the Pt/GC catalyst} = \frac{42 \mu\text{C}}{210 \mu\text{C cm}^{-2}} = 0.2 \text{ cm}^2$$

$$ECSA \text{ of the NiOx/Pt/GC catalyst} = \frac{26.46 \mu\text{C}}{210 \mu\text{C cm}^{-2}} = 0.126 \text{ cm}^2$$

$$ECSA \text{ of the } FeOx/NiOx/Pt/GC \text{ catalyst} = \frac{23.1 \mu C}{210 \mu C cm^{-2}} = 0.11 cm^2$$

$$ECSA \text{ of the } a - FeOx/NiOx/Pt/GC \text{ catalyst} = \frac{14.7 \mu C}{210 \mu C cm^{-2}} = 0.07 cm^2$$

$$ECSA \text{ of the } NiOx/FeOx/Pt/GC \text{ catalyst} = \frac{23.1 \mu C}{210 \mu C cm^{-2}} = 0.11 cm^2$$

$$ECSA \frac{\text{at } NiOx/a - FeOx/Pt}{GC} \text{ catalyst} = \frac{18.9 \mu C}{210 \mu C cm^{-2}} = 0.09 cm^2$$

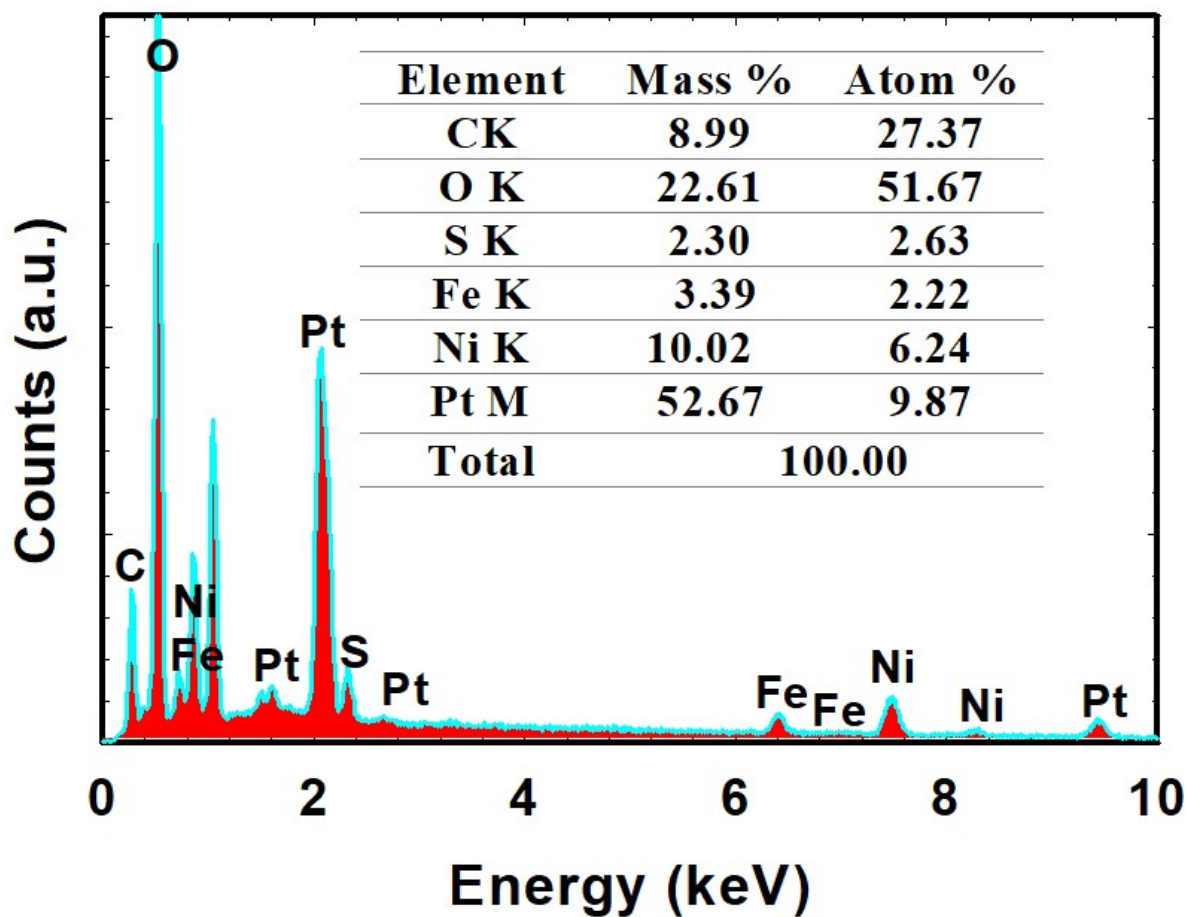

Fig. S2: The EDX spectrum of FeOx/NiOx/Pt/GC electrode.

### Mass of Nano-Pt calculation.

We care in estimating the mass activity only about the mass of the precious element (Pt) that can be calculated from Faraday's law using the charge employed in the nano-Pt deposition. As mentioned in the experimental section, nano-Pt was deposited onto the GC electrode via potential step electrolysis (from 1 to 0.1 V) for 300 s in 0.1 mol L<sup>-1</sup> H<sub>2</sub>SO<sub>4</sub> containing 1 mmol L<sup>-1</sup> K<sub>2</sub>PtCl<sub>6</sub> solution. To calculate the mass activity in mA mg<sup>-1</sup><sub>Pt</sub>, the current obtained for FAO was divided by the mass of deposited Pt (mg<sub>Pt</sub>). This mass of nano-Pt was 5.0 μg, as estimated from the integrated charge, Q, in the i-t curve (Fig. S3) of the nano-Pt deposition using Faraday's law:

$$m = \frac{QM}{zF}$$

where M is atomic mass of Pt, z (= 4) is the number of transferred electrons in the nano-Pt deposition, F (≈ 96,500 C mole<sup>-1</sup>) is the Faraday's constant.

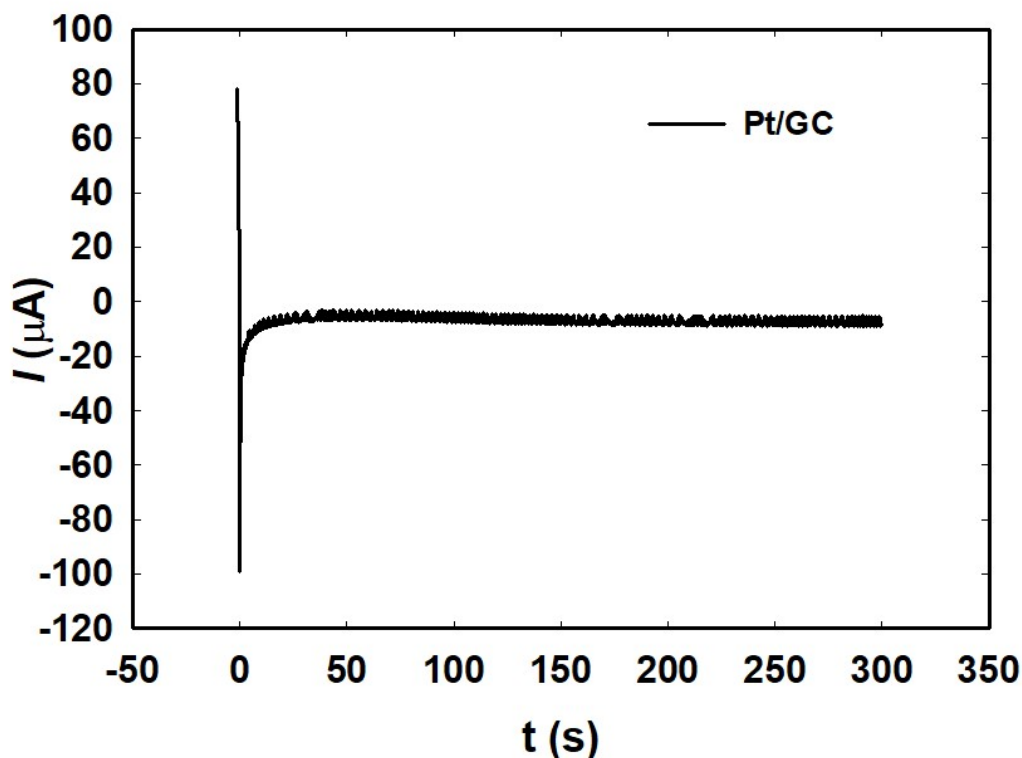

Fig. S3: The i-t curve of the nano-Pt deposition onto the GC electrode.
